# Supplementary material
Source: MDPI journal article supplement (https://www.mdpi.com/2410-3888/8/7/363)
Supplement: s1 [file s1]

# First Record of Spinal Deformity in the South American Silver Croaker *Plagioscion squamosissimus* (Eupercaria: Sciaenidae) in the Xingu River, Brazil

Luciano Fogaça de Assis Montag <sup>1</sup>, Luiz Antônio Wanderley Peixoto <sup>2</sup>, Lidia Brasil Seabra <sup>1</sup>,  
Liziane Amaral Barbosa Gonçalves <sup>3</sup>, Cleonice Maria Cardoso Lobato <sup>4</sup>, Marina Barreira Mendonça <sup>5</sup>,  
Tiago Octavio Begot <sup>1</sup>, Erival Gonçalves Prata <sup>1</sup> and Tiago Magalhães da Silva Freitas <sup>6,\*</sup>

<sup>1</sup> Laboratório de Ecologia e Conservação, Universidade Federal do Pará, Rua Augusto Corrêa 01, Guamá, Belém 66075-110, PA, Brazil; lfamontag@gmail.com (L.F.A.M.); lidiabrasil95@gmail.com (L.B.S.); tbegot@gmail.com (T.O.B.); erival.gprata@gmail.com (E.G.P.)

<sup>2</sup> Instituto de Estudos Costeiros de Bragança, Universidade Federal do Pará, Alameda Leandro Ribeiro, Aldeia, Bragança 68600-000, PA, Brazil; luizwp@yahoo.com.br

<sup>3</sup> Laboratório de Histologia, Universidade Federal do Pará, Rua Augusto Corrêa 01, Guamá, Belém 66075-110, PA, Brazil; lizbarbipesca@gmail.com

<sup>4</sup> Laboratório de Avaliação e Monitoramento da Biodiversidade, Programa de Pós-Graduação em Ecologia, Universidade Federal do Rio de Janeiro, Rua Moniz Aragão N° 360, Bloco 1, Ilha do Fundão, Cidade Universitária, Rio de Janeiro 21941-594, RJ, Brazil; lobatocmc@gmail.com

<sup>5</sup> Laboratório de Ictiologia de Soure, Universidade Federal do Pará, Décima Terceira rua, s/n., Umirizal, Soure 68870-000, PA, Brazil; barreira.mm@gmail.com

<sup>6</sup> Laboratório de Zoologia, Universidade Federal do Pará, Alameda IV, 3418, Parque Universitário, Breves 68800-000, PA, Brazil

\* Correspondence: freitastms@gmail.com

**Table S1.** Standard length (SL) between deformed and normal individuals of *Plagioscion squamosissimus* within the same body weight range, and their respective differences.

| Total mass (g)        | SL abnormal individuals (cm) | SL normal body (cm) | Differences (%) |
|-----------------------|------------------------------|---------------------|-----------------|
| 28.9                  | 9.3                          | 12.0                | −29.0%          |
| 69.0                  | 15.1                         | 16.4                | −20.2%          |
| 122.0                 | 16.4                         | 19.9                | −21.3%          |
| 136.0                 | 20.8                         | 21.5                | −20.2%          |
| 165.0                 | 19.5                         | 22.5                | −20.2%          |
| 261.0                 | 21.0                         | 25.0                | −19.0%          |
| 276.0                 | 20.1                         | 27.0                | −34.3%          |
| 280.2                 | 22.5                         | 26.5                | −17.8%          |
| 301.4                 | 20.0                         | 26.5                | −32.5%          |
| Average differences = |                              |                     | −23.8%          |
